# 1 **Evidence for anti-viral effects of complete Freund's adjuvant** 2 **in the mouse model of enterovirus infection**

3 Arunakumar Gangaplar<sup>1, #a</sup>, Chandirasegaran Massilamany<sup>1¶, #b</sup>, Ninaad Lasrado<sup>1¶</sup>, David  
4 Steffen<sup>1</sup>, and Jay Reddy<sup>1\*</sup>

5 <sup>1</sup> School of Veterinary Medicine and Biomedical Sciences, University of Nebraska-Lincoln,  
6 Lincoln, Nebraska, 68583, United States of America; [ninaad@huskers.unl.edu](mailto:ninaad@huskers.unl.edu) (N.L);  
7 [dsteffen1@unl.edu](mailto:dsteffen1@unl.edu) (D.S)

8 <sup>#a</sup> Current Address: Laboratory of Early Sickle Mortality Prevention, Cellular and Molecular  
9 Therapeutics Branch, National Heart, Lung, and Blood Institute, National Institutes of Health,  
10 Bethesda, Maryland, 20892, United States of America; [arunakumar.gangaplar@nih.gov](mailto:arunakumar.gangaplar@nih.gov) (A.G)

11 <sup>#b</sup> Current Address: CRISPR Therapeutics, Cambridge, Massachusetts, 02139, United States of  
12 America; [mchandirasegaran@gmail.com](mailto:mchandirasegaran@gmail.com) (C.M)

13 <sup>¶</sup>Equal contributors

14 \*Correspondence: [jayreddy@unl.edu](mailto:jayreddy@unl.edu)

15 **Keywords:** Enterovirus; Adjuvant; CFA; BCG; COVID-19

## 16 **Abstract**

17           Group B Coxsackieviruses belonging to the genus, Enterovirus, contain six serotypes that  
18 induce various diseases, whose occurrence may involve the mediation of more than one serotype.  
19 We recently identified immunogenic epitopes within CVB3 viral protein 1 that induce anti-viral T  
20 cell responses in mouse models of CVB infections. In our investigations to determine the  
21 protective responses of the viral epitopes, we unexpectedly noted that animals immunized with  
22 complete Freund's adjuvant (CFA) alone and later challenged with CVB3 were completely  
23 protected against myocarditis. Similarly, the pancreatitis-inducing ability of CVB3 was  
24 remarkably reduced to only 10% in the CFA group as opposed to 73.3% in the control group that  
25 received no CFA. Additionally, no mortalities were noted in the CFA group, whereas 40% of  
26 control animals died during the course of 21 days post-infection with CVB3. Taken together, our  
27 data suggest that the adjuvant effects of CFA may be sufficient for protection against CVB  
28 infections. These observations may provide new insights into our understanding of the occurrence  
29 of viral infections. One example is Coronavirus disease-19 (COVID-19) as individuals suffering  
30 from COVID-19 who have been vaccinated with Bacillus Calmette–Guérin appear to have fewer  
31 morbidities and mortalities than unvaccinated individuals.

32

## 33 **Introduction**

34 Enteroviruses belonging to the *Picornaviridae* family are positive-sense, single-stranded RNA  
35 viruses. Based on the currently adopted method of molecular typing of the viral protein (VP)1  
36 nucleotide composition, 13 species of enteroviruses have been identified [1]. Infections caused by  
37 four enterovirus species, Enterovirus A to D, are the most common that occur in humans, especially  
38 infants (children less than 1 year of age) and immune-compromised individuals [1, 2].  
39 Enteroviruses induce a wide spectrum of illnesses, such as meningitis, encephalitis, paralysis,  
40 myocarditis, and rash/foot and mouth disease [2]. Although enteroviral infections can occur  
41 anywhere in the world, recent outbreaks of respiratory illness in the United States highlight their  
42 growing importance in human health [3-5].

43 We have been studying the cellular and molecular mechanisms of protective immune  
44 responses in mouse models, particularly for Coxsackievirus B3 (CVB3) and CVB4, which are  
45 implicated in the causation of myocarditis/dilated cardiomyopathy and Type I diabetes (T1D),  
46 respectively [6, 7]. In our efforts to determine the protective effects of viral epitopes, we  
47 unexpectedly noted that animals immunized with complete Freund's adjuvant (CFA) containing  
48 *Mycobacterium tuberculosis* (M. tb) extract were found to be completely protected from CVB3  
49 infection. Our data may provide new insights regarding the occurrence of viral infections such as  
50 Coronavirus disease-19 (COVID-19), since individuals vaccinated with Bacillus Calmette–Guérin  
51 (BCG) tend to show fewer morbidities and mortalities than unvaccinated individuals [8, 9].

## 52 **Materials and Methods**

### 53 **Mice**

54 Six-to-eight-week old, female A/J mice (H-2<sup>a</sup>) were procured from the Jackson Laboratory  
55 (Bar Harbor, ME, USA). Animals were maintained according to the institutional guidelines of the  
56 University of Nebraska-Lincoln (UNL), Lincoln, NE, and approval for animal studies was granted  
57 by the Institutional Animal Care and Use Committee, UNL (protocol #1904, approved January 2,  
58 2020). Mice infected with CVB3 were monitored closely for clinical signs suggestive of distress.  
59 All research staff followed biosafety level 2 guidelines while handling the animals. Animals whose  
60 clinical signs persisted, did not eat or drink, and failed to move when touched or prodded physically  
61 were immediately euthanized. Euthanasia was performed using a carbon dioxide chamber as  
62 recommended by the Panel on Euthanasia, the American Veterinary Medical Association.

### 63 **Virus propagation and infection**

64 The Nancy strain of CVB3 was procured from the American Type Culture Collection (ATCC,  
65 Manassas, VA, USA), and the virus was titrated in Vero cells (ATCC). The adherent Vero cells  
66 were grown to 80 to 90% confluence in 75cm<sup>2</sup> flasks in EMEM/10% fetal bovine serum (FBS) and  
67 were later infected with CVB3 with multiplicity of infection 1 in EMEM containing no FBS. After  
68 incubation at 37° C for 1 hour with gentle intermittent rocking, maintenance medium (EMEM/2%  
69 FBS) was added. Based on the cytopathic effect of virus during the next 1 to 2 days, supernatants  
70 containing virus were harvested. After determining 50% tissue culture infective dose (TCID<sub>50</sub>)  
71 values based on the Reed-Muench method, the virus stocks were aliquoted and preserved at -80°  
72 C [10]. To infect mice, virus stock diluted in 1x PBS to contain 50 TCID<sub>50</sub> in 100 µl was  
73 administered intraperitoneally (i.p.). We chose this dose based on titration experiments [10] that  
74 allowed us to capture pathological changes in both heart and pancreas over a period of 3 weeks by

75 avoiding acute mortalities that usually occur at relatively higher doses within ~10 days post-  
76 infection [11, 12]. Animals were monitored closely, cages were changed once in 2 days, and body  
77 weights were taken daily until termination. In addition, an alternative food and fluid source, trans  
78 gel diet (ClearH2O, Portland, ME, USA), was placed on the cage floor as needed.

## 79 **Challenge studies in animals immunized with CFA**

80 Our initial focus was to determine the protective effects, if any, of virus-reactive T cells by  
81 immunizing mice with viral peptides that we have recently described elsewhere [13]. In these  
82 investigations, two groups – CVB3 infection alone and CFA immunizations/CVB3 challenge –  
83 were involved. Groups of mice were immunized subcutaneously with or without CFA containing  
84 *M. tb* [14] (Difco Laboratories, Detroit, MI, USA) to a final concentration of 5 mg/ml as a single  
85 dose (200  $\mu$ l; Sigma-Aldrich, St. Louis, MO, USA) on day -7 in sternal and inguinal regions [15].  
86 Seven days later (day 0), animals were challenged with CVB3 at 50 TCID<sub>50</sub>/mouse, i.p., and after  
87 taking body weights and monitoring for mortalities, experiments were terminated on days 20-21  
88 post-infection and tissues were collected for histology.

## 89 **Histology**

90 Hearts and pancreata were fixed in 10% phosphate-buffered formalin and processed to obtain  
91 5  $\mu$ m thick serial sections, ~50  $\mu$ m apart. All sections were stained by Hematoxylin and Eosin (H  
92 & E). The analysis was performed by a board-certified pathologist blinded to treatment, and total  
93 number of inflammatory foci were obtained as reported previously [10, 16].

## 94 **Statistics**

95 Generalized linear mixed models were used to analyze the data pertaining to body weights  
96 and survival curves using Proc Glimmix in SAS (Version 9.3, SAS Institute Inc., Cary, NC, USA).

- 97    Graphs were prepared by GraphPad Prism software Version 8.0 (GraphPad Software, Inc. La Jolla,  
98    CA, USA). Barnard's exact test was used to analyze the histological parameters [17].

## 99 Results and Discussion

100 In this report, we provide evidence that immunization with immune-stimulating adjuvants like  
101 CFA alone can offer protection against viral infections. In this setting, we used A/J mice that are  
102 highly susceptible to CVB3 infections, with affected animals showing severe pancreatitis and  
103 myocarditis within approximately 7 to 10 days post-infection [13, 16, 18]. Although our primary  
104 focus was to determine whether viral peptides can offer protection in challenge studies with CVB3,  
105 we made an unexpected observation that the protection offered by CFA emulsions containing viral  
106 peptides was indistinguishable (data not shown) from that conferred by immunization with CFA  
107 alone. First, we noted that the positive control group (unimmunized) infected with CVB3 showed  
108 reduction in body weights by ~20% as expected, whereas none of the animals immunized with  
109 CFA alone lost body weight (Fig 1a). Second, mortality patterns were also found to be similar to  
110 those of body weights, in that none of the animals immunized with CFA alone died, whereas 40%  
111 of animals (6/15) in the control group died (Fig 1b), pointing to the possibility that CFA-  
112 immunized animals would also be free of histologic disease.

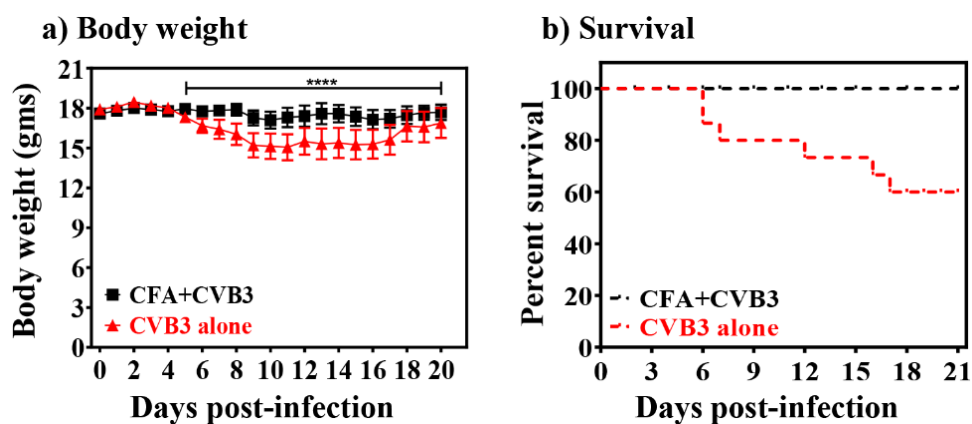

113

114 **Figure 1. Evaluation of effects of CFA in CVB3 infection of A/J mice. a) Body weight.**  
115 A/J mice were immunized once (-D7) with or without CFA alone and were challenged with  
116 CVB3 on day 0. Body weights were taken up to 20 days post-challenge with CVB3. Mean  $\pm$   
117 SEM values obtained from two experiments, each involving 5 to 10 mice, are shown. **b)**  
118 **Survival.** Mortalities noted up to 21 days post-challenge are shown in the survival curves.  
119 \*\*\*\* $p \leq 0.0001$ .

120 To investigate pathological changes, we examined the hearts and pancreata by H & E staining  
121 and scored disease severity as we have described previously [10, 15, 16]. As indicated in Table 1,  
122 top panel, and Figure 2, heart sections in 40% (6/15) of the animals from the CVB3-infected group  
123 showed myocardial lesions containing inflammatory foci with macrophage infiltrates, necrosis and  
124 mineralization as expected [10, 16], but none of the animals in the CFA group had any detectable  
125 lesions. Similarly, histological evaluation of pancreatic sections from the CVB3-infected group  
126 revealed expected lesions such as atrophy, inflammation, necrosis, and mineralization, whereas in  
127 the CFA group, only 10% (1/10) of the animals had detectable lesions (Table 1, bottom panel, and  
128 Figure 2). Taken together, the findings that animals immunized with CFA alone were protected  
129 against both myocarditis and pancreatitis induced with CVB3 supports the idea that non-specific  
130 priming of the immune system with adjuvants like CFA may be sufficient to prevent virus  
131 infections.

132 **Table 1: Histological evaluation of hearts and pancreata in mice immunized with or**  
133 **without CFA challenged with CVB3.**

134

| <b>Parameters</b>   | <b>CVB3 group</b> | <b>CFA/CVB3 challenged group</b> |
|---------------------|-------------------|----------------------------------|
| <u>Myocarditis</u>  |                   |                                  |
| Incidence           | 6/15 (40.0)       | 0/10 (0.0)                       |
| Inflammatory foci   | 54.4 ± 17.7       | 0.0                              |
| <u>Pancreatitis</u> |                   |                                  |
| Incidence           | 11/15 (73.3)      | 1/10 (10.0)                      |
| Atrophy             | 7/15 (46.7)       | 1/10 (10.0)                      |
| Inflammation        | 11/15 (73.3)      | 1/10 (10.0)                      |
| Necrosis            | 8/15 (53.3)       | 0/10 (0.0)                       |
| Mineralization      | 4/15 (26.7)       | 1/10 (10.0)                      |

() indicates percentages; all parameters were significant ( $p \leq 0.01$ )



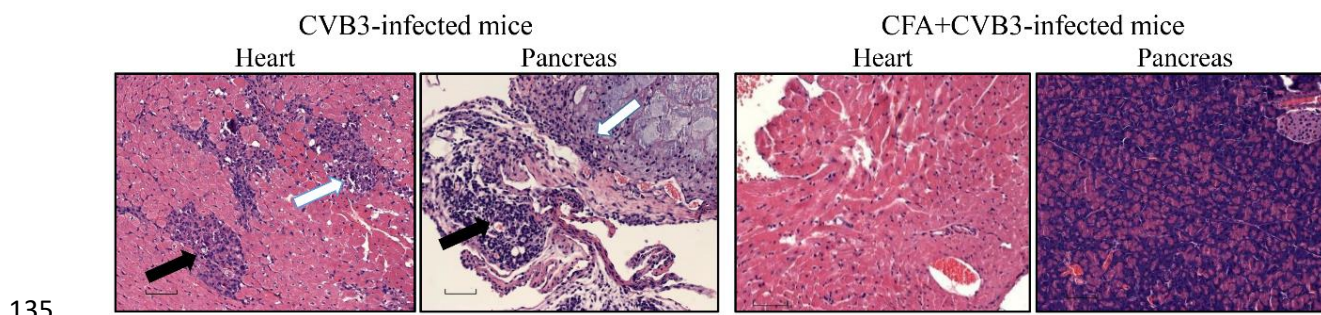

136 **Figure 2. Determination of histological changes in mice immunized with or without CFA**  
137 **and later challenged with CVB3.** A/J mice were immunized with or without CFA on D-7  
138 and animals were challenged with CVB3 i.p., on day 0. Hearts and pancreata were examined  
139 by H and E staining to determine histological changes. The left panel indicates representative  
140 sections from CVB3-infected mice showing multiple inflammatory foci, and necrosis (solid  
141 arrow) and mineralization (empty arrow) in the heart, whereas pancreas showed changes such  
142 as atrophy and infiltrations (solid arrow) and necrosis and mineralization (empty arrow). The  
143 right panel denotes heart and pancreatic sections from CFA+CVB3-infected group in which  
144 lesions were absent. Original magnification: 20x.

145  
146 Disease protection offered by CFA was rather perplexing to explain, because CFA was not  
147 expected to induce antigen-specific immune responses to prevent infection with CVB3.  
148 Historically, CFA containing *M. tb* has been used as a powerful immune-stimulating adjuvant, and  
149 it contains immunoreactive molecules, such as N-acetylmuramyl-l-alanyl-d-isoglutamine  
150 (muramyl dipeptide) and trehalose 6,6'-dimycolate, all of which promote Th1 cell polarization by  
151 inducing IFN- $\gamma$  [19-21]. Reports indicate that the BCG bacterium can enhance immunogenicity  
152 and also promote type 1 IFN response as shown in various settings such as vaccinations against  
153 influenza and hepatitis B viruses in humans [22, 23], and infection studies with  
154 encephalomyocarditis, murine hepatitis (mouse coronavirus), type 1 and 2 herpes simplex,  
155 vaccinia and foot-and-mouth disease viruses in mice [24-29]. Additionally, bacterial CpG  
156 nucleotides promote Th1 (IFN- $\gamma$ ) response [30], which is critical for protection against intracellular  
157 pathogens and viruses through the production of interleukin-12 by interacting with toll-like  
158 receptor-9 [31, 32]. Thus, we believe that the disease-protective ability of CFA may reflect non-  
159 antigen-specific effects attributable to the adjuvanticity of *M. tb*.

160           However, our data point to a few other possible mechanisms: (i) Exposure to non-specific  
161 infections that promote Th1 cytokine responses may offer protection against viral infections  
162 possibly by preventing viral replication [20, 21, 33]. If this holds true, then our data may also  
163 potentially provide credence to the hygiene hypothesis [34, 35]. (ii) A growing body of evidence  
164 suggests that the trained innate memory may be an important property of the innate immune  
165 system. Myeloid cells, such as monocytes and macrophages, Natural killer (NK) cells, NK-T cells,  
166  $\gamma\delta$  T cells, and possibly innate lymphoid cells, exposed to a microbe – for example, ‘x’ microbe –  
167 can robustly respond to this microbe upon re-exposure, and also for other unrelated microbial  
168 stimulations through epigenetic and metabolic reprogramming pathways [36-38]. Consistent with  
169 this notion, it has been shown that BCG vaccine can offer protection against other unrelated  
170 pathogens, such as *Candida albicans*, *Schistosoma mansoni* and *Staphylococcus aureus* [39-42],  
171 including autoimmune diseases such as Type I Diabetes and multiple sclerosis [43-47].  
172 Conversely, it is also possible that exposure to one type of pathogen can suppress immune  
173 responses to entirely different types of pathogens. For example, co-administration of oral polio  
174 vaccine with BCG at birth can diminish the response to purified protein derivative from BCG [48].  
175 Although whether or not it is currently known that trained innate memory is an underlying  
176 mechanism for CFA effects as noted in our studies, this aspect may need to be investigated.

177           Finally, it may be noted that the ongoing pandemic outbreak of COVID-19 has offered new  
178 insights in regard to BCG vaccination, in that morbidities and mortalities appear to be low in BCG  
179 vaccine recipients [8]. Although the practice of BCG vaccination varies widely across the globe  
180 [49, 50], isolated reports showing an evidence of an inverse relationship between BCG  
181 vaccinations and COVID-19 attributable mortalities as noted in few countries, if not all  
182 (Supplementary Table 1) [8, 9]. But, such a relationship could be contributed by the confounding

183 factors such as demographic and genetic variations in the affected populations, loopholes in the  
184 social distancing and quarantine measures, availability of diagnostic tools and prompt reporting of  
185 positive cases [51]. Nonetheless, the evolving notion of inverse relationship between BCG and  
186 clinical outcomes of severe acute respiratory syndrome coronavirus 2 (SARS CoV-2) infection  
187 that causes COVID-19 raise fundamental questions as to the immunological relationship between  
188 the two entities. While the BCG vaccine contains live *Mycobacterium bovis* (a pathogen of cattle),  
189 CFA contains the killed extract of *M. tb* (a pathogen of humans). Yet all 13 known mycobacterial  
190 species, including the two species identified above, show more than 99% nucleotide similarity,  
191 suggesting that all of them may have similar adjuvant properties [52, 53]. Thus, our data may  
192 provide experimental evidence for the notion that certain degree of resistance to COVID-19  
193 infection in BCG vaccine recipients may be attributable to the adjuvant effects of mycobacteria  
194 that may involve the trained innate memory. If this notion holds true, then it creates opportunities  
195 to use BCG or its ingredients, such as CpG nucleotides, as anti-viral compounds. To this end,  
196 several phase III clinical trials have been initiated in a number of countries to test whether the BCG  
197 vaccination can offer protection or alter prognosis of COVID-19 infection [51, 54]. However, it  
198 should be noted that BCG vaccination is performed at birth, whereas COVID-19 infection tends  
199 to be more common in the elderly population [55, 56]. Although existence of multiple co-  
200 morbidities may explain fatalities in these patient populations, the data also lead to the question  
201 whether beneficial effects of BCG can last so long. Additionally, readers are urged to cautiously  
202 interpret the direct translational significance of our findings to humans, since CVB3 and SARS  
203 CoV-2 are two different viruses. Thus, evaluation of the effect of BCG in appropriate animal  
204 models that capture the disease phenotypes of humans in response to SARS Cov-2 may provide  
205 more definitive information.

206           One limitation of our study is that we did not investigate the presence of virus in tissues of  
207 CVB3-infected mice. Similarly, it is unknown whether CFA administration can potentiate the  
208 production of protective neutralizing antibodies to CVB3, and if so, how long such an effect would  
209 last against different doses of virus. Likewise, whether administration of CFA in the face of CVB3  
210 infection can mitigate the disease process is also unknown. At the time of this writing, we could  
211 not execute these experiments since our institutional guidelines do not allow any new animal  
212 experiments because of the ongoing threat of COVID-19 to the public. Nonetheless, our data may  
213 provide insights into our understanding of the occurrence of viral infections in the face of pre-  
214 existing, non-antigen-specific immune responses generated in response to a potentially wide range  
215 of environmental pathogens/microbes or gut microbiota over a period of time, which also may  
216 include formation of virtual memory cells [57, 58].

217

218 **Abbreviations**

|     |            |                                                 |
|-----|------------|-------------------------------------------------|
| 219 | BCG        | Bacillus Calmette–Guérin                        |
| 220 | CFA        | complete Freund’s adjuvant                      |
| 221 | COVID-19   | Coronavirus disease-19                          |
| 222 | CVB        | Coxsackievirus B                                |
| 223 | EMEM       | Eagle’s minimum essential medium                |
| 224 | FBS        | fetal bovine serum                              |
| 225 | IFN        | interferon                                      |
| 226 | I.p.       | intra peritoneal                                |
| 227 | M.tb       | <i>Mycobacterium tuberculosis</i>               |
| 228 | NK         | Natural killer                                  |
| 229 | PBS        | phosphate-buffered saline                       |
| 230 | RNA        | ribonucleic acid                                |
| 231 | SARS-CoV-2 | severe acute respiratory syndrome coronavirus 2 |
| 232 | T1D        | Type 1 diabetes                                 |
| 233 | Th         | T helper                                        |
| 234 | VP         | viral protein                                   |

235  
236 **Author Contributions:** Conceptualization, AG, CM and JR; validation, NL, DS, and JR; formal  
237 analysis, NL and DS; investigation, AG, CM, NL, DS and JR; data curation, NL; writing—original  
238 draft preparation, NL, AG, CM, and JR; writing—review and editing, NL, AG, CM, and JR;  
239 visualization, NL; funding acquisition, J.R.

240  
241 **Funding:** This work was supported by the Scientist Development Grant (09SDG2010237), the  
242 Transformational grant, the American Heart Association (18TPA34170206), and the National  
243 Institutes of Health (HL114669).

244  
245 **Acknowledgments:** We thank Dr. Yuzhen Zhou for his assistance with the statistical analysis.

246  
247 **Conflicts of Interest:** The authors declare no financial or commercial conflicts of interest.

248

## 249 References

- 250 1. Baggen, J., et al., *The life cycle of non-polio enteroviruses and how to target it (vol 16, pg*  
251 *368, 2018)*. Nature Reviews Microbiology, 2018. **16**(6): p. 391-391.
- 252 2. Noor, A. and L.R. Krilov, *Enterovirus Infections*. Pediatrics in Review, 2016. **37**(12): p. 505-  
253 515.
- 254 3. Pons-Salort, M., E.P.K. Parker, and N.C. Grassly, *The epidemiology of non-polio*  
255 *enteroviruses: recent advances and outstanding questions*. Current Opinion in Infectious  
256 Diseases, 2015. **28**(5): p. 479-487.
- 257 4. Lugo, D. and P. Krogstad, *Enteroviruses in the early 21st century: new manifestations and*  
258 *challenges*. Current Opinion in Pediatrics, 2016. **28**(1): p. 107-113.
- 259 5. Midgley, C.M., et al., *Severe respiratory illness associated with a nationwide outbreak of*  
260 *enterovirus D68 in the USA (2014): a descriptive epidemiological investigation*. Lancet  
261 Respiratory Medicine, 2015. **3**(11): p. 879-887.
- 262 6. Cihakova, D. and N.R. Rose, *Pathogenesis of myocarditis and dilated cardiomyopathy*. Adv  
263 Immunol, 2008. **99**: p. 95-114.
- 264 7. Jaidane, H. and D. Hober, *Role of coxsackievirus B4 in the pathogenesis of type 1 diabetes*.  
265 Diabetes Metab, 2008. **34**(6 Pt 1): p. 537-48.
- 266 8. Miller, A., et al., *Correlation between universal BCG vaccination policy and reduced*  
267 *morbidity and mortality for COVID-19: an epidemiological study*. medRxiv, 2020: p.  
268 2020.03.24.20042937.
- 269 9. Shet, A., et al., *Differential COVID-19-attributable mortality and BCG vaccine use in*  
270 *countries*. medRxiv, 2020: p. 2020.04.01.20049478.
- 271 10. Gangaplara, A., et al., *Coxsackievirus B3 infection leads to the generation of cardiac myosin*  
272 *heavy chain- $\alpha$ -reactive CD4 T cells in A/J mice*. Clinical immunology, 2012. **144**(3): p. 237-  
273 249.
- 274 11. Gebhard, J.R., et al., *Coxsackievirus B3-induced myocarditis: perforin exacerbates disease,*  
275 *but plays no detectable role in virus clearance*. Am J Pathol, 1998. **153**(2): p. 417-28.
- 276 12. Crocker, S.J., et al., *Amelioration of coxsackievirus B3-mediated myocarditis by inhibition of*  
277 *tissue inhibitors of matrix metalloproteinase-1*. Am J Pathol, 2007. **171**(6): p. 1762-73.
- 278 13. Lasrado, N., et al., *Identification of Immunogenic Epitopes That Permit the Detection of*  
279 *Antigen-Specific T Cell Responses in Multiple Serotypes of Group B Coxsackievirus*  
280 *Infections*. Viruses, 2020. **12**(3).
- 281 14. Opie, E.L. and J. Freund, *An Experimental Study of Protective Inoculation with Heat Killed*  
282 *Tubercle Bacilli*. J Exp Med, 1937. **66**(6): p. 761-88.
- 283 15. Massilamany, C., et al., *Identification of novel mimicry epitopes for cardiac myosin heavy*  
284 *chain- $\alpha$  that induce autoimmune myocarditis in A/J mice*. Cellular immunology, 2011. **271**(2):  
285 p. 438-449.

- 286 16. Massilamany, C., et al., *Mutations in the 5' NTR and the Non-Structural Protein 3A of the*  
287 *Coxsackievirus B3 Selectively Attenuate Myocarditogenicity*. PLoS One, 2015. **10**(6): p.  
288 e0131052.
- 289 17. Barnard, G.A., *A New Test for 2 × 2 Tables*. Nature, 1945. **156**(3954): p. 177-177.
- 290 18. Fairweather, D. and N.R. Rose, *Coxsackievirus-induced myocarditis in mice: a model of*  
291 *autoimmune disease for studying immunotoxicity*. Methods, 2007. **41**(1): p. 118-22.
- 292 19. Su, S.B., et al., *Essential role of the MyD88 pathway, but nonessential roles of TLRs 2, 4, and*  
293 *9, in the adjuvant effect promoting Th1-mediated autoimmunity*. J Immunol, 2005. **175**(10):  
294 p. 6303-10.
- 295 20. Comoy, E.E., A. Capron, and G. Thyphronitis, *Adjuvant is the major parameter influencing*  
296 *the isotype profiles generated during immunization with a protein antigen, the Schistosoma*  
297 *mansoni Sm28-GST*. Scand J Immunol, 1998. **47**(5): p. 444-52.
- 298 21. Traub, S., et al., *MDP and other muropeptides--direct and synergistic effects on the immune*  
299 *system*. J Endotoxin Res, 2006. **12**(2): p. 69-85.
- 300 22. Leentjens, J., et al., *BCG Vaccination Enhances the Immunogenicity of Subsequent Influenza*  
301 *Vaccination in Healthy Volunteers: A Randomized, Placebo-Controlled Pilot Study*. J Infect  
302 Dis, 2015. **212**(12): p. 1930-8.
- 303 23. Scheid, A., et al., *Adjuvant Effect of Bacille Calmette-Guerin on Hepatitis B Vaccine*  
304 *Immunogenicity in the Preterm and Term Newborn*. Front Immunol, 2018. **9**: p. 29.
- 305 24. Lodmell, D.L. and L.C. Ewalt, *Enhanced resistance against encephalomyocarditis virus*  
306 *infection in mice, induced by a nonviable Mycobacterium tuberculosis oil-droplet vaccine*.  
307 Infect Immun, 1978. **19**(1): p. 225-30.
- 308 25. Starr, S.E., et al., *Effects of immunostimulants on resistance of newborn mice to herpes*  
309 *simplex type 2 infection*. Proc Soc Exp Biol Med, 1976. **152**(1): p. 57-60.
- 310 26. Floc'h, F. and G.H. Werner, *Increased resistance to virus infections of mice inoculated with*  
311 *BCG (Bacillus calmette-guerin)*. Ann Immunol (Paris), 1976. **127**(2): p. 173-86.
- 312 27. Moorlag, S., et al., *Non-specific effects of BCG vaccine on viral infections*. Clin Microbiol  
313 Infect, 2019. **25**(12): p. 1473-1478.
- 314 28. Mathurin, K.S., et al., *CD4 T-Cell-Mediated Heterologous Immunity between Mycobacteria*  
315 *and Poxviruses*. Journal of Virology, 2009. **83**(8): p. 3528-3539.
- 316 29. Suenaga, T., et al., *Effect of Mycobacterium tuberculosis BCG infection on the resistance of*  
317 *mice to ectromelia virus infection: participation of interferon in enhanced resistance*. Infect  
318 Immun, 1978. **20**(1): p. 312-4.
- 319 30. Chu, R.S., et al., *CpG oligodeoxynucleotides act as adjuvants that switch on T helper 1 (Th1)*  
320 *immunity*. J Exp Med, 1997. **186**(10): p. 1623-31.
- 321 31. Suzuki, Y., F.K. Conley, and J.S. Remington, *Importance of endogenous IFN-gamma for*  
322 *prevention of toxoplasmic encephalitis in mice*. J Immunol, 1989. **143**(6): p. 2045-50.
- 323 32. Shrestha, B., et al., *Gamma interferon plays a crucial early antiviral role in protection against*  
324 *West Nile virus infection*. J Virol, 2006. **80**(11): p. 5338-48.

- 325 33. Yamagami, H., et al., *Trehalose 6,6'-dimycolate (cord factor) of Mycobacterium tuberculosis*  
326 *induces foreign-body- and hypersensitivity-type granulomas in mice*. *Infect Immun*, 2001.  
327 **69**(2): p. 810-5.
- 328 34. Strachan, D.P., *Hay fever, hygiene, and household size*. *BMJ*, 1989. **299**(6710): p. 1259-60.
- 329 35. Okada, H., et al., *The 'hygiene hypothesis' for autoimmune and allergic diseases: an update*.  
330 *Clin Exp Immunol*, 2010. **160**(1): p. 1-9.
- 331 36. Netea, M.G., et al., *Trained immunity: A program of innate immune memory in health and*  
332 *disease*. *Science*, 2016. **352**(6284): p. aaf1098.
- 333 37. Netea, M.G., et al., *Defining trained immunity and its role in health and disease*. *Nat Rev*  
334 *Immunol*, 2020.
- 335 38. Netea, M.G. and J.W. van der Meer, *Trained Immunity: An Ancient Way of Remembering*.  
336 *Cell Host Microbe*, 2017. **21**(3): p. 297-300.
- 337 39. Kleinnijenhuis, J., et al., *Bacille Calmette-Guerin induces NOD2-dependent nonspecific*  
338 *protection from reinfection via epigenetic reprogramming of monocytes*. *Proc Natl Acad Sci*  
339 *U S A*, 2012. **109**(43): p. 17537-42.
- 340 40. van 't Wout, J.W., R. Poell, and R. van Furth, *The role of BCG/PPD-activated macrophages*  
341 *in resistance against systemic candidiasis in mice*. *Scand J Immunol*, 1992. **36**(5): p. 713-9.
- 342 41. Sher, N.A., et al., *Effects of BCG, Corynebacterium parvum, and methanol-extraction residue*  
343 *in the reduction of mortality from Staphylococcus aureus and Candida albicans infections in*  
344 *immunosuppressed mice*. *Infect Immun*, 1975. **12**(6): p. 1325-30.
- 345 42. Tribouley, J., J. Tribouley-Duret, and M. Appriou, *[Effect of Bacillus Calmette Guerin (BCG)*  
346 *on the receptivity of nude mice to Schistosoma mansoni]*. *C R Seances Soc Biol Fil*, 1978.  
347 **172**(5): p. 902-4.
- 348 43. Kuhlreiber, W.M. and D.L. Faustman, *BCG Therapy for Type 1 Diabetes: Restoration of*  
349 *Balanced Immunity and Metabolism*. *Trends Endocrinol Metab*, 2019. **30**(2): p. 80-92.
- 350 44. Faustman, D.L., *TNF, TNF inducers, and TNFR2 agonists: A new path to type 1 diabetes*  
351 *treatment*. *Diabetes Metab Res Rev*, 2018. **34**(1).
- 352 45. Ristori, G., et al., *Effects of Bacille Calmette-Guerin after the first demyelinating event in the*  
353 *CNS*. *Neurology*, 2014. **82**(1): p. 41-8.
- 354 46. Ristori, G., et al., *Bridging the gap between vaccination with Bacille Calmette-Guerin (BCG)*  
355 *and immunological tolerance: the cases of type 1 diabetes and multiple sclerosis*. *Curr Opin*  
356 *Immunol*, 2018. **55**: p. 89-96.
- 357 47. Karaci, M., *The Protective Effect of the BCG Vaccine on the Development of Type 1 Diabetes*  
358 *in Humans*, in *The Value of BCG and TNF in Autoimmunity*. 2014. p. 52-62.
- 359 48. Jensen, K.J., et al., *The immunological effects of oral polio vaccine provided with BCG*  
360 *vaccine at birth: a randomised trial*. *Vaccine*, 2014. **32**(45): p. 5949-56.
- 361 49. Zwerling, A., et al., *The BCG World Atlas: a database of global BCG vaccination policies*  
362 *and practices*. *PLoS Med*, 2011. **8**(3): p. e1001012.



- 363 50. Worldometer, *Worldometers.info*. 2020. *Coronavirus Update: Cases And Deaths From*  
364 *COVID-19 Virus Pandemic - Worldometer*. [online] Available at:  
365 <<https://www.worldometers.info/coronavirus/>> [Accessed 27 May 2020]. 2020.
- 366 51. O'Neill, L.A.J. and M.G. Netea, *BCG-induced trained immunity: can it offer protection*  
367 *against COVID-19?* Nat Rev Immunol, 2020.
- 368 52. Malone, K.M., et al., *Comparative 'omics analyses differentiate Mycobacterium tuberculosis*  
369 *and Mycobacterium bovis and reveal distinct macrophage responses to infection with the*  
370 *human and bovine tubercle bacilli*. Microb Genom, 2018. **4**(3).
- 371 53. Garnier, T., et al., *The complete genome sequence of Mycobacterium bovis*. Proc Natl Acad  
372 Sci U S A, 2003. **100**(13): p. 7877-82.
- 373 54. Clinicaltrials.gov, *Clinical trials for BCG in relation to COVID-19*.  
374 [https://clinicaltrials.gov/ct2/results?cond=BCG+vaccination+and+COVID-](https://clinicaltrials.gov/ct2/results?cond=BCG+vaccination+and+COVID-19&term=&cntry=&state=&city=&dist=)  
375 [19&term=&cntry=&state=&city=&dist=](https://clinicaltrials.gov/ct2/results?cond=BCG+vaccination+and+COVID-19&term=&cntry=&state=&city=&dist=), 2020.
- 376 55. Zheng, Z., et al., *Risk factors of critical & mortal COVID-19 cases: A systematic literature*  
377 *review and meta-analysis*. J Infect, 2020.
- 378 56. Sinclair, A.J. and A.H. Abdelhafiz, *Age, frailty and diabetes - triple jeopardy for vulnerability*  
379 *to COVID-19 infection*. EClinicalMedicine, 2020: p. 100343.
- 380 57. Van Kaer, L., *Innate and virtual memory T cells in man*. Eur J Immunol, 2015. **45**(7): p. 1916-  
381 20.
- 382 58. White, J.T., et al., *Virtual memory T cells develop and mediate bystander protective immunity*  
383 *in an IL-15-dependent manner*. Nat Commun, 2016. **7**: p. 11291.
- 384
- 385

386 **Supplementary information****Supplementary Table 1: Current global status of BCG vaccination and its relationship with the number of COVID-19 cases reported as of May 27, 2020**

| Country     | Continent     | TB incidence (per 100,000/year) | Income group        | Vaccination policy and current status | 1 <sup>st</sup> vaccination | COVID-19 cases | Case fatality rate (in %) |
|-------------|---------------|---------------------------------|---------------------|---------------------------------------|-----------------------------|----------------|---------------------------|
| Afghanistan | Asia          | 189                             | Low income          | Universal/Yes                         | At birth                    | 12,456         | 1.86                      |
| Albania     | Europe        | 18                              | Upper middle income | Universal/Yes                         | At birth                    | 1,050          | 3.20                      |
| Algeria     | Africa        | 69                              | Upper middle income | Universal/Yes                         | At birth                    | 8,697          | 7.09                      |
| Andorra     | Europe        | 3                               | High income         | Universal/No                          | At birth                    | 763            | 6.68                      |
| Angola      | Africa        | 355                             | Upper middle income | Universal/Yes                         | At birth                    | 71             | 5.63                      |
| Argentina   | South America | 27                              | Upper middle income | Universal/Yes                         | At birth                    | 13,228         | 3.66                      |
| Armenia     | Europe        | 31                              | Lower middle income | Universal/Yes                         | At birth                    | 7,774          | 1.22                      |
| Australia   | Oceania       | 6.6                             | High income         | Universal/No                          | After infancy               | 7,139          | 1.43                      |
| Austria     | Europe        | 7.1                             | High income         | Universal/No                          | At birth                    | 16,557         | 3.89                      |
| Azerbaijan  | Eurasia       | 63                              | Upper middle income | Universal/Yes                         | At birth                    | 4,568          | 1.18                      |
| Bahrain     | Asia          | 11                              | High income         | Universal/Yes                         | At birth                    | 9,633          | 0.14                      |
| Bangladesh  | Asia          | 221                             | Lower middle income | Universal/Yes                         | At birth                    | 38,292         | 1.42                      |
| Barbados    | North America | 0.4                             | High income         | Universal/Yes                         | After infancy               | 92             | 7.60                      |
| Belarus     | Europe        | 31                              | Upper middle income | Universal/Yes                         | At birth                    | 38,956         | 0.54                      |
| Belgium     | Europe        | 9                               | High income         | Specific or none/No                   | At birth                    | 57,592         | 16.24                     |
| Belize      | South America | 30                              | Upper middle income | Universal/Yes                         | At birth                    | 18             | 11.11                     |
| Benin       | Africa        | 56                              | Low income          | Universal/Yes                         | At birth                    | 210            | 1.44                      |

|                          |               |     |                     |                     |             |         |      |
|--------------------------|---------------|-----|---------------------|---------------------|-------------|---------|------|
| Bermuda                  | North America | 3.7 | High income         | Universal/Yes       | At birth    | 139     | 6.47 |
| Bhutan                   | Asia          | 149 | Lower middle income | Universal/Yes       | At birth    | 27      | 0.00 |
| Bolivia                  | South America | 108 | Lower middle income | Universal/Yes       | At birth    | 7,136   | 3.84 |
| Bosnia and Herzegovina   | Europe        | 25  | Upper middle income | Universal/Yes       | At birth    | 2,435   | 6.16 |
| Botswana                 | Africa        | 275 | Upper middle income | Universal/Yes       | At birth    | 35      | 2.85 |
| Brazil                   | South America | 45  | Upper middle income | Universal/Yes       | At birth    | 394,407 | 6.26 |
| Bulgaria                 | Europe        | 22  | Upper middle income | Universal/Yes       | At birth    | 2,460   | 5.40 |
| Burkina Faso             | Africa        | 48  | Low income          | Universal/Yes       | At birth    | 845     | 6.27 |
| Burundi                  | Africa        | 111 | Low income          | Universal/Yes       | At birth    | 42      | 2.38 |
| Cambodia                 | Asia          | 302 | Lower middle income | Universal/Yes       | At birth    | 124     | 0.00 |
| Cameroon                 | Africa        | 186 | Lower middle income | Universal/Yes       | At birth    | 5,436   | 3.26 |
| Canada                   | North America | 5.6 | High income         | Specific or none/No | After birth | 86,647  | 7.64 |
| Central African Republic | Africa        | 540 | Low income          | Universal/Yes       | At birth    | 671     | 0.14 |
| Chad                     | Africa        | 142 | Low income          | Universal/Yes       | At birth    | 700     | 8.85 |
| Chile                    | South America | 18  | High income         | Universal/Yes       | At birth    | 77,961  | 1.03 |
| China                    | Asia          | 61  | Upper middle income | Universal/Yes       | At birth    | 82,993  | 5.51 |
| Colombia                 | South America | 33  | Upper middle income | Universal/Yes       | At birth    | 23,003  | 3.37 |
| Congo                    | Africa        | 321 | Low income          | Universal/Yes       | At birth    | 487     | 3.33 |
| Costa Rica               | South America | 10  | Upper middle income | Universal/Yes       | At birth    | 956     | 1.04 |
| Croatia                  | Europe        | 8.4 | High income         | Universal/Yes       | At birth    | 2,244   | 4.50 |
| Cuba                     | South America | 7.2 | Upper middle income | Universal/Yes       | At birth    | 1,963   | 4.17 |
| Cyprus                   | Europe        | 5.4 | High income         | Specific/Yes        | After birth | 939     | 1.81 |

|                    |               |     |                     |               |               |         |       |
|--------------------|---------------|-----|---------------------|---------------|---------------|---------|-------|
| Czech Republic     | Europe        | 5.4 | High income         | Universal/No  | At birth      | 9,052   | 3.50  |
| Denmark            | Europe        | 5.4 | High income         | Universal/No  | At birth      | 11,480  | 4.93  |
| Djibouti           | Africa        | 260 | Lower middle income | Universal/Yes | At birth      | 2,468   | 0.56  |
| Dominica           | North America | 6.4 | Upper middle income | Universal/Yes | At birth      | 16      | 0.00  |
| Dominican Republic | North America | 45  | Upper middle income | Universal/Yes | At birth      | 15,264  | 3.06  |
| Ecuador            | South America | 44  | Upper middle income | Universal/No  | At birth      | 37,355  | 8.57  |
| Egypt              | Africa        | 12  | Lower middle income | Universal/Yes | At birth      | 18,756  | 4.24  |
| El Salvador        | South America | 70  | Lower middle income | Universal/Yes | At birth      | 2,109   | 1.76  |
| Equatorial Guinea  | Africa        | 201 | Upper middle income | Universal/Yes | At birth      | 1,043   | 1.15  |
| Eritrea            | Africa        | 89  | Low income          | Universal/Yes | At birth      | 39      | 0.00  |
| Estonia            | Europe        | 13  | High income         | Universal/Yes | At birth      | 1,840   | 3.54  |
| Ethiopia           | Africa        | 151 | Low income          | Universal/Yes | At birth      | 731     | 0.85  |
| Fiji               | Oceania       | 54  | Upper middle income | Universal/Yes | At birth      | 18      | 0.00  |
| Finland            | Europe        | 4.7 | High income         | Universal/No  | At birth      | 6,692   | 4.70  |
| France             | Europe        | 8.9 | High income         | Universal/No  | At birth      | 182,722 | 19.57 |
| Gabon              | Africa        | 525 | Upper middle income | Universal/Yes | At birth      | 2,238   | 0.62  |
| Gambia             | Africa        | 174 | Low income          | Universal/Yes | At birth      | 25      | 4.00  |
| Georgia            | Europe        | 80  | Upper middle income | Universal/Yes | At birth      | 735     | 1.63  |
| Germany            | Europe        | 7.3 | High income         | Universal/No  | At birth      | 181,530 | 4.65  |
| Ghana              | Africa        | 148 | Lower middle income | Universal/Yes | At birth      | 7,117   | 0.47  |
| Greece             | Europe        | 4.5 | High income         | Universal/Yes | After infancy | 2,892   | 5.98  |
| Greenland          | Europe        | 100 | High income         | Universal/Yes | At birth      | 12      | 0.00  |

|               |               |     |                     |                     |               |         |       |
|---------------|---------------|-----|---------------------|---------------------|---------------|---------|-------|
| Guatemala     | South America | 26  | Upper middle income | Universal/Yes       | At birth      | 3,954   | 1.59  |
| Guinea        | Africa        | 176 | Low income          | Universal/Yes       | At birth      | 3,275   | 0.59  |
| Guinea-Bissau | Africa        | 361 | Low income          | Universal/Yes       | At birth      | 1,178   | 0.51  |
| Guyana        | South America | 83  | Upper middle income | Universal/Yes       | At birth      | 139     | 7.91  |
| Haiti         | North America | 176 | Low income          | Universal/Yes       | After birth   | 1,174   | 2.81  |
| Honduras      | North America | 37  | Lower middle income | Universal/Yes       | At birth      | 4,401   | 4.27  |
| Hong Kong     | Asia          | 67  | High income         | Universal/Yes       | At birth      | 1,067   | 0.37  |
| Hungary       | Europe        | 6.4 | High income         | Universal/Yes       | At birth      | 3,793   | 13.31 |
| Iceland       | Europe        | 2.7 | High income         | Specific or none/No | At birth      | 1,805   | 0.55  |
| India         | Asia          | 199 | Lower middle income | Universal/Yes       | At birth      | 154,181 | 2.85  |
| Indonesia     | Asia          | 316 | Lower middle income | Universal/Yes       | At birth      | 23,851  | 6.12  |
| Iran          | Asia          | 14  | Upper middle income | Universal/Yes       | At birth      | 141,591 | 5.38  |
| Iraq          | Asia          | 42  | Upper middle income | Universal/Yes       | At birth      | 4,848   | 3.48  |
| Ireland       | Europe        | 7   | High income         | Universal/Yes       | At birth      | 24,735  | 6.52  |
| Israel        | Asia          | 4   | High income         | Universal/No        | At birth      | 16,771  | 1.67  |
| Italy         | Europe        | 7   | High income         | Specific or none/No | After birth   | 230,555 | 14.29 |
| Jamaica       | North America | 2.9 | Upper middle income | Universal/Yes       | At birth      | 564     | 1.59  |
| Japan         | Asia          | 14  | High income         | Universal/Yes       | After birth   | 16,623  | 5.15  |
| Jordan        | Asia          | 5   | Upper middle income | Universal/Yes       | After infancy | 718     | 1.25  |
| Kazakhstan    | Asia          | 68  | Upper middle income | Universal/Yes       | At birth      | 9,304   | 0.39  |
| Kenya         | Africa        | 292 | Lower middle income | Universal/Yes       | At birth      | 1,471   | 3.85  |
| Korea, Rep.   | Asia          | 66  | High income         | Universal/Yes       | At birth      | 11,265  | 2.38  |

|            |               |     |                     |                     |          |        |       |
|------------|---------------|-----|---------------------|---------------------|----------|--------|-------|
| Kuwait     | Asia          | 23  | High income         | Universal/Yes       | At birth | 23,267 | 0.76  |
| Kyrgyzstan | Asia          | 116 | Lower middle income | Universal/Yes       | At birth | 1,520  | 1.05  |
| Laos       | Asia          | 162 | Lower middle income | Universal/Yes       | At birth | 19     | 0.00  |
| Latvia     | Europe        | 29  | High income         | Universal/Yes       | At birth | 1,057  | 2.08  |
| Lebanon    | Asia          | 11  | Upper middle income | Specific or none/No | At birth | 1,161  | 2.28  |
| Liberia    | Africa        | 308 | Low income          | Universal/Yes       | At birth | 266    | 9.71  |
| Libya      | Africa        | 40  | Upper middle income | Universal/Yes       | At birth | 77     | 3.89  |
| Lithuania  | Europe        | 44  | High income         | Universal/Yes       | At birth | 1,647  | 3.96  |
| Luxembourg | Europe        | 8   | High income         | Universal/No        | At birth | 3,995  | 2.75  |
| Madagascar | Africa        | 233 | Low income          | Universal/Yes       | At birth | 612    | 0.34  |
| Malawi     | Africa        | 181 | Low income          | Universal/Yes       | At birth | 101    | 3.96  |
| Malaysia   | Asia          | 92  | Upper middle income | Universal/Yes       | At birth | 7,619  | 1.51  |
| Maldives   | Asia          | 33  | Upper middle income | Universal/Yes       | At birth | 1,457  | 0.34  |
| Mali       | Africa        | 53  | Low income          | Universal/Yes       | At birth | 1,077  | 6.50  |
| Malta      | Europe        | 14  | High income         | Universal/Yes       | At birth | 612    | 0.98  |
| Mauritania | Africa        | 93  | Lower middle income | Universal/Yes       | At birth | 268    | 3.43  |
| Mauritius  | Africa        | 13  | Upper middle income | Universal/Yes       | At birth | 334    | 2.99  |
| Mexico     | North America | 23  | Upper middle income | Universal/Yes       | At birth | 74,560 | 10.90 |
| Moldova    | Europe        | 86  | Lower middle income | Universal/Yes       | At birth | 7,305  | 3.65  |
| Monaco     | Europe        | 0   | High income         | Specific/Yes        | At birth | 98     | 4.08  |
| Mongolia   | Asia          | 428 | Lower middle income | Universal/Yes       | At birth | 148    | 0.00  |
| Morocco    | Africa        | 99  | Lower middle income | Universal/Yes       | At birth | 7,584  | 2.66  |

|                  |               |     |                     |                     |             |         |       |
|------------------|---------------|-----|---------------------|---------------------|-------------|---------|-------|
| Mozambique       | Africa        | 551 | Low income          | Universal/Yes       | At birth    | 213     | 0.46  |
| Myanmar          | Asia          | 338 | Lower middle income | Universal/Yes       | After birth | 206     | 2.91  |
| Namibia          | Africa        | 524 | Upper middle income | Universal/Yes       | At birth    | 22      | 0.00  |
| Nepal            | Asia          | 151 | Low income          | Universal/Yes       | After birth | 886     | 0.51  |
| Netherlands      | Europe        | 5.3 | High income         | Specific or none/No | At birth    | 45,768  | 12.84 |
| New Zealand      | Oceania       | 7.3 | High income         | Universal/No        | At birth    | 1,504   | 1.82  |
| Nicaragua        | North America | 41  | Lower middle income | Universal/Yes       | At birth    | 759     | 4.61  |
| Niger            | Africa        | 87  | Low income          | Universal/Yes       | At birth    | 952     | 6.61  |
| Nigeria          | Africa        | 219 | Lower middle income | Universal/Yes       | At birth    | 8,344   | 2.98  |
| North Macedonia  | Europe        | 13  | Upper middle income | Universal/Yes       | At birth    | 2,039   | 5.83  |
| Norway           | Europe        | 4.1 | High income         | Universal/No        | At birth    | 8,391   | 2.81  |
| Oman             | Asia          | 5.9 | High income         | Universal/Yes       | At birth    | 8,373   | 0.45  |
| Pakistan         | Asia          | 265 | Lower middle income | Universal/Yes       | At birth    | 59,151  | 2.07  |
| Panama           | North America | 52  | High income         | Universal/Yes       | At birth    | 11,447  | 2.73  |
| Papua New Guinea | Oceania       | 432 | Lower middle income | Universal/Yes       | At birth    | 8       | 0.00  |
| Paraguay         | South America | 43  | Upper middle income | Universal/Yes       | At birth    | 877     | 1.25  |
| Peru             | South America | 123 | Upper middle income | Universal/Yes       | At birth    | 129,751 | 2.91  |
| Philippines      | Asia          | 554 | Lower middle income | Universal/Yes       | At birth    | 15,049  | 6.04  |
| Poland           | Europe        | 16  | High income         | Universal/Yes       | At birth    | 22,303  | 4.63  |
| Portugal         | Europe        | 24  | High income         | Universal/Yes       | At birth    | 31,292  | 4.32  |
| Qatar            | Asia          | 31  | High income         | Universal/Yes       | At birth    | 48,947  | 0.05  |
| Romania          | Europe        | 68  | Upper middle income | Universal/Yes       | At birth    | 18,594  | 6.56  |

|                                |               |     |                     |               |             |         |       |
|--------------------------------|---------------|-----|---------------------|---------------|-------------|---------|-------|
| Russia                         | Asia          | 54  | Upper middle income | Universal/Yes | At birth    | 370,680 | 1.05  |
| Rwanda                         | Africa        | 59  | Low income          | Universal/Yes | At birth    | 339     | 0.00  |
| Saudi Arabia                   | Asia          | 10  | High income         | Universal/Yes | At birth    | 78,541  | 0.53  |
| Senegal                        | Africa        | 118 | Lower middle income | Universal/Yes | At birth    | 3,253   | 1.17  |
| Serbia                         | Europe        | 17  | Upper middle income | Universal/Yes | At birth    | 11,275  | 2.12  |
| Seychelles                     | Africa        | 18  | High income         | Universal/Yes | At birth    | 11      | 0.00  |
| Sierra Leone                   | Africa        | 298 | Low income          | Universal/Yes | At birth    | 782     | 5.83  |
| Singapore                      | Asia          | 47  | High income         | Universal/Yes | At birth    | 32,876  | 0.07  |
| Slovak Republic                | Europe        | 5.8 | High income         | Universal/No  | At birth    | 1,515   | 1.85  |
| Slovenia                       | Europe        | 5.3 | High income         | Universal/No  | At birth    | 1,471   | 7.21  |
| Somalia                        | Africa        | 262 | Low income          | Universal/Yes | At birth    | 1,711   | 3.91  |
| South Africa                   | Africa        | 520 | Upper middle income | Universal/Yes | At birth    | 24,264  | 2.16  |
| South Sudan                    | Africa        | 146 | Low income          | Universal/Yes | At birth    | 806     | 0.99  |
| Spain                          | Europe        | 9.4 | High income         | Universal/No  | At birth    | 283,339 | 11.47 |
| Sri Lanka                      | Asia          | 64  | Upper middle income | Universal/Yes | At birth    | 1,372   | 0.75  |
| St. Kitts and Nevis            | North America | 0   | High income         | Universal/Yes | At birth    | 15      | 0.00  |
| St. Lucia                      | North America | 3.2 | Upper middle income | Universal/Yes | After birth | 18      | 0.00  |
| St. Vincent and the Grenadines | North America | 6.3 | Upper middle income | Universal/Yes | At birth    | 18      | 0.00  |
| Sudan                          | Africa        | 71  | Lower middle income | Universal/Yes | At birth    | 4,146   | 4.27  |
| Sweden                         | Europe        | 5.5 | High income         | Universal/No  | After birth | 35,088  | 11.97 |
| Switzerland                    | Europe        | 6.4 | High income         | Universal/No  | At birth    | 30,776  | 5.36  |
| Syria                          | Asia          | 19  | Low income          | Universal/Yes | At birth    | 121     | 3.30  |



|                          |               |     |                     |                     |               |           |       |
|--------------------------|---------------|-----|---------------------|---------------------|---------------|-----------|-------|
| Tanzania                 | Africa        | 253 | Low income          | Universal/Yes       | At birth      | 509       | 4.12  |
| Thailand                 | Asia          | 153 | Upper middle income | Universal/Yes       | At birth      | 3,056     | 1.87  |
| Timor-Leste              | Asia          | 498 | Lower middle income | Universal/Yes       | After birth   | 24        | 0.00  |
| Togo                     | Africa        | 36  | Low income          | Universal/Yes       | At birth      | 391       | 3.32  |
| Trinidad and Tobago      | North America | 21  | High income         | Universal/No        | At birth      | 116       | 6.89  |
| Tunisia                  | Africa        | 35  | Lower middle income | Universal/Yes       | At birth      | 1,051     | 4.56  |
| Turkey                   | Eurasia       | 16  | Upper middle income | Universal/Yes       | After birth   | 158,762   | 2.77  |
| Uganda                   | Africa        | 200 | Low income          | Universal/Yes       | At birth      | 253       | 0.00  |
| Ukraine                  | Europe        | 80  | Lower middle income | Universal/Yes       | After birth   | 21,905    | 2.98  |
| UAE                      | Asia          | 2   | High income         | Universal/Yes       | At birth      | 31,086    | 0.81  |
| United Kingdom           | Europe        | 8   | High income         | Universal/No        | After infancy | 265,227   | 13.96 |
| United States of America | North America | 3   | High income         | Specific or none/No | At birth      | 1,729,998 | 5.88  |
| Uruguay                  | South America | 33  | High income         | Universal/Yes       | At birth      | 789       | 2.78  |
| Uzbekistan               | Asia          | 70  | Lower middle income | Universal/Yes       | At birth      | 3,355     | 0.42  |
| Venezuela                | South America | 48  | Upper middle income | Universal/Yes       | At birth      | 1,211     | 0.90  |
| Vietnam                  | Asia          | 182 | Lower middle income | Universal/Yes       | At birth      | 327       | 0.00  |
| Zambia                   | Africa        | 346 | Lower middle income | Universal/Yes       | At birth      | 1,057     | 0.76  |
| Zimbabwe                 | Africa        | 210 | Lower middle income | Universal/Yes       | At birth      | 56        | 7.10  |

387 Yellow highlights, BCG vaccination not practiced

388 TB, tuberculosis; BCG, Bacillus Calmette–Guérin; COVID, Corona virus disease
